# Supplementary material for: Role of Pd nanoparticles in gas sensing behaviour of Pd@In2O3 yolk–shell nanoreactors
Source: Royal Society of Chemistry journal article supplement (doi:10.1039/c5ta08873a), 2015-11-19

## Supporting Information

### Role of Pd nanoparticles on gas sensing behaviour of Pd@In<sub>2</sub>O<sub>3</sub> yolk-shell nanoreactors

Prabhakar Rai<sup>a\*</sup>, Ji-Wook Yoon,<sup>b</sup> Chang Hoon Kwak<sup>b</sup>, Jong-Heun Lee<sup>b\*</sup>

<sup>a</sup>Department of Chemical Engineering, Indian Institute of Technology Kanpur, Kanpur  
208016, India

<sup>b</sup>Department of Materials Science and Engineering, Korea University, Anam-Dong 5-1,  
Seoul 136-713, South Korea

\*Corresponding author; Email: prkrai@iitk.ac.in, jongheun@korea.ac.kr

**Figure S1** Long term stability test of Pd@In<sub>2</sub>O<sub>3</sub> yolk-shell NPs based sensor for 5 ppm of ethanol at 350°C in dry air.

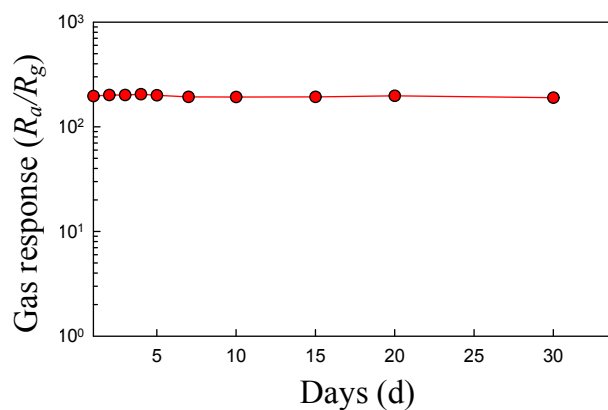

**Figure S2** Response of Pd@In<sub>2</sub>O<sub>3</sub> yolk-shell NPs in (a) dry and (b) RH 80% at 350°C (E: EtOH, C: CO, H: H<sub>2</sub>, F: HCHO, A: NH<sub>3</sub>, N: NO<sub>2</sub>, T: TMA, X: XYL).

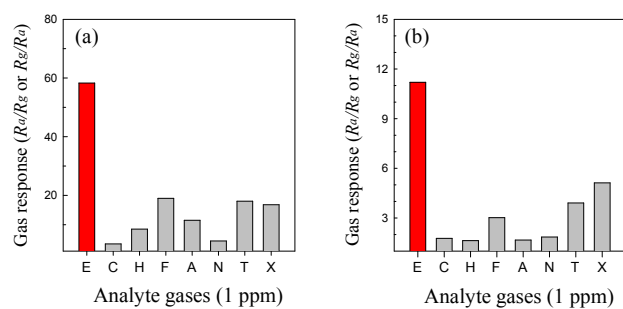

Supplement: c5ta08873a1.pdf [file c5ta08873a1.pdf]
